# Supplementary material for: Rare germline variants in DNA repair genes and the angiogenesis pathway predispose prostate cancer patients to develop metastatic disease
Source: PubMed Central journal article supplement (PMC6035259; doi:10.1038/s41416-018-0141-7), 2018-06-19
Supplement: 41416_2018_141_MOESM1_ESM.pdf [file 41416_2018_141_MOESM1_ESM.pdf]

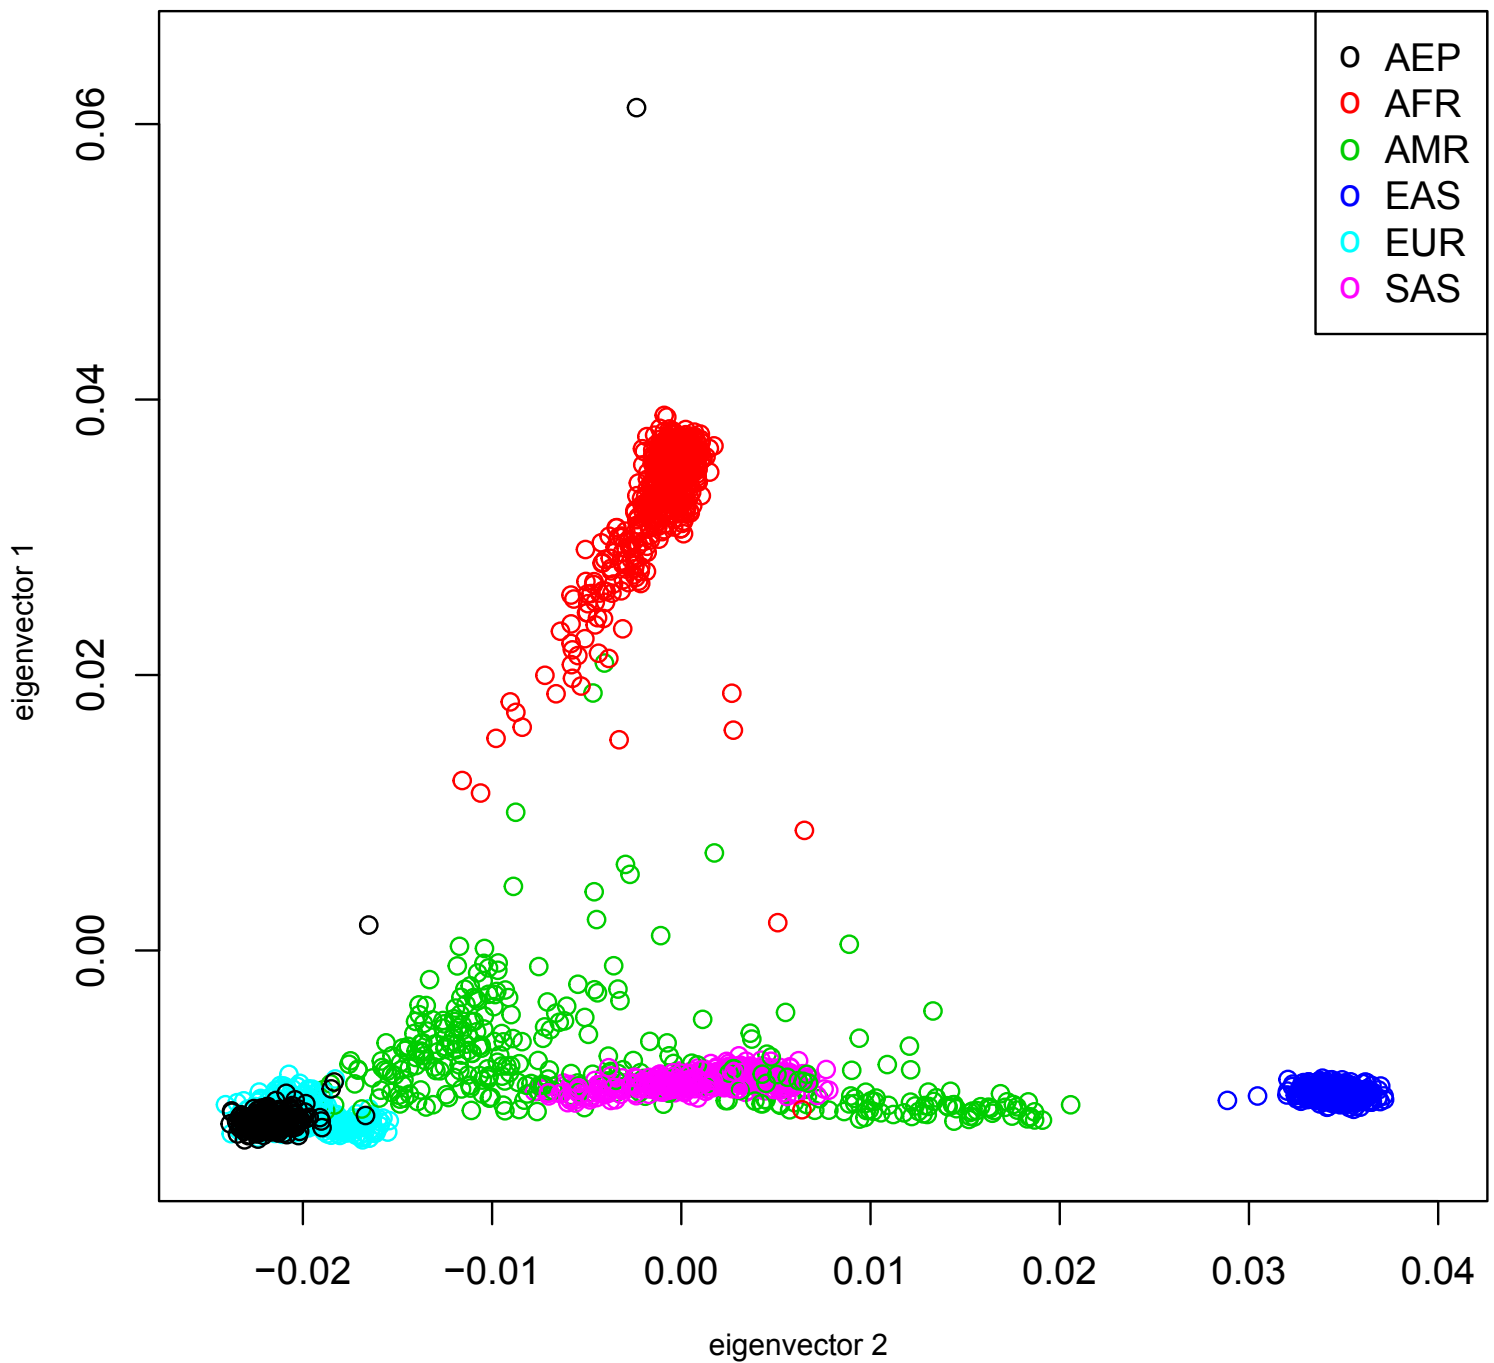

**Supplementary Figure 1 – Ancestry of samples relative to 1000 Genomes Phase 3 populations.** Principal Component Analysis depicting genetic ancestry of our full study cohort of self-reported European ancestry individuals unstratified for aggressive status (AEP) compared to individuals from the five 1000 Genomes super populations; African (AFR), Ad-mixed American (AMR), East Asian (EAS), European (EUR), South Asian (SAS).
