# Supplementary material for: Rare germline variants in DNA repair genes and the angiogenesis pathway predispose prostate cancer patients to develop metastatic disease
Source: PubMed Central journal article supplement (PMC6035259; doi:10.1038/s41416-018-0141-7), 2018-06-19
Supplement: 41416_2018_141_MOESM2_ESM.pdf [file 41416_2018_141_MOESM2_ESM.pdf]

**a)**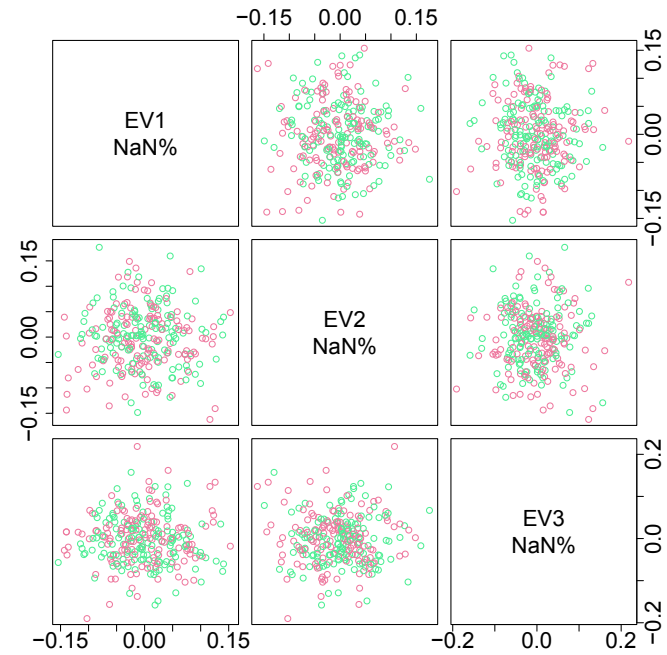**b)**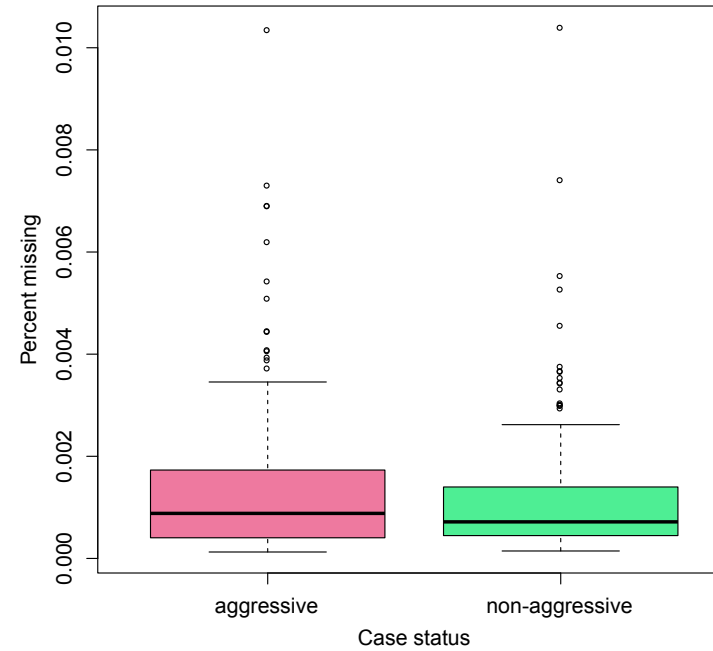**c)**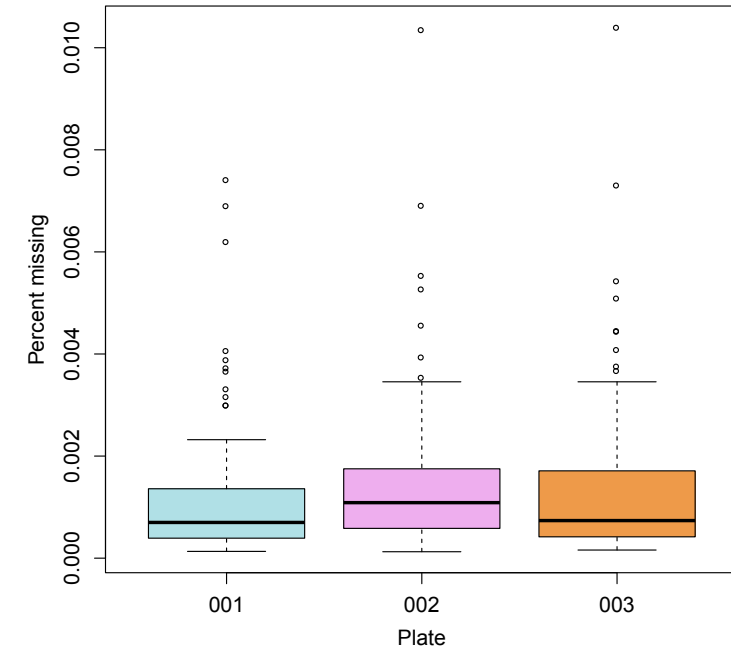

**Supplementary Figure 2 – Evaluation of samples for potential batch effect confounders.** **a)** Principal Component Analysis highlighted by case status. Pairs for the first three Principal Components are shown for non-aggressive (green) and aggressive (pink) samples. **b)** Assessment of genotype call rates by case status. **c)** Assessment of genotype call rate by sequencing library preparation workflow plate. No evidence for underlying genetic or artefactual confounding effects was observed between or within phenotype groups.
