# Supplementary material for: Rare germline variants in DNA repair genes and the angiogenesis pathway predispose prostate cancer patients to develop metastatic disease
Source: PubMed Central journal article supplement (PMC6035259; doi:10.1038/s41416-018-0141-7), 2018-06-19
Supplement: 41416_2018_141_MOESM5_ESM.pdf [file 41416_2018_141_MOESM5_ESM.pdf]

a)

| Exclusion criteria                           | Variants excluded | Variants remain |
|----------------------------------------------|-------------------|-----------------|
| Non-exonic or splicing                       | 506,198           | 174,815         |
| >5% missing data                             | 5312              | 169,503         |
| GATK VQSR (99.9 level)                       | 2183              | 167,320         |
| Monomorphic                                  | 1445              | 165,875         |
| <95% samples with Genotype Quality $\geq 20$ | 3772              | 162,103         |
| <95% samples with Depth $\geq 8$             | 3780              | 158,323         |
| <b>Total</b>                                 | <b>522,690</b>    | <b>158,323</b>  |

b)

| Exclusion criteria                                 | Samples excluded | Samples remain |
|----------------------------------------------------|------------------|----------------|
| Low coverage (<80% at 20x)                         | 2                | 286            |
| Contamination (>10%)                               | 2                | 284            |
| >3 $\times$ SD heterozygosity                      | 2                | 282            |
| Mixed ancestry (and >3 $\times$ SD heterozygosity) | 2                | 280            |
| <b>Total</b>                                       | <b>8</b>         | <b>280</b>     |

c)

| Exclusion criteria         | Variants excluded | Variants remain |
|----------------------------|-------------------|-----------------|
| All genotypes as reference | 6586              | 151,737         |
| Monomorphic                | 175               | 151,562         |
| >5% missing data           | 236               | 151,326         |
| HWE ( $p < 10^{-5}$ )      | 539               | 150,787         |
| <b>Total</b>               | <b>7536</b>       | <b>150,787</b>  |

**Supplementary Table 1 – Sample and variant QC procedures.** **a) Variant filtering pre-sample QC.** QC is first performed at the variant level to remove low quality variants prior to sample level QC procedures. All variants situated outside of coding regions or splice sites, with missing genotype data in >5% samples, predicted as false positives by GATK's VQSR (variant quality score recalibration), that were monomorphic, that had low quality scores in >5% samples or had low depth of sequencing coverage in >5% samples were excluded. **b) Sample QC.** Sample QC was performed using the filtered variant catalogue generated through pre-sample QC. Samples with low coverage of target regions, appreciable contamination, high heterozygosity or mixed ancestry were excluded from further analysis. **c) Variant filtering post-sample QC.** Additional variant filtering was performed using the final set of quality filtered samples to exclude variants that were reference-only, monomorphic, had >5% missing genotype data or deviated from Hardy-Weinberg equilibrium in the final sample cohort.
