# Supplementary material for: Rare germline variants in DNA repair genes and the angiogenesis pathway predispose prostate cancer patients to develop metastatic disease
Source: PubMed Central journal article supplement (PMC6035259; doi:10.1038/s41416-018-0141-7), 2018-06-19
Supplement: 41416_2018_141_MOESM6_ESM.pdf [file 41416_2018_141_MOESM6_ESM.pdf]

a)

| Classification | Description                                                     | Total Variants | MAF <1%       |
|----------------|-----------------------------------------------------------------|----------------|---------------|
| Tier 1         | PTVs (Frameshift, nonsense, STOP insertion and splice variants) | 4924           | 4240          |
| Tier 2         | Non-PTVs with CADD score $\geq 20$                              | 39,080         | 31,372        |
| Tier 3         | All other variants                                              | 106,783        | 62,188        |
|                |                                                                 | <b>150,787</b> | <b>97,800</b> |

b)

| Variant Frequency Category | Total Variants |
|----------------------------|----------------|
| Common (MAF $\geq 5\%$ )   | 33,663         |
| Low frequency (MAF 1-5%)   | 19,324         |
| Rare (MAF <1%)             | 82,333         |
| Not observed in ExAC       | 15,467         |
| <b>Total</b>               | <b>150,787</b> |

**Supplementary Table 2 – Predicted functional impact of variants passing QC. a) Variant classification by predicted functional consequence.** Variants were classified into 3 categories according to their predicted functional effects. Tier 1 contains variants predicted as deleterious and comprises protein truncating variants (PTVs). Tier 2 contains variants that are predicted as damaging and comprises non-truncating variants with CADD score  $\geq 20$ . Tier 3 contains all other variants and variants in this category were excluded during downstream analyses. Rare variants were designated as those with a minor allele frequency (MAF) <1% in non-Finnish Europeans in the ExAC database. **b) Frequency distribution of variants in non-Finnish Europeans in the ExAC database.** The majority of coding variants identified in our sample cohort were low frequency, with approximately 10% not observed in the ExAC database.
