# Supplementary material for: Rare germline variants in DNA repair genes and the angiogenesis pathway predispose prostate cancer patients to develop metastatic disease
Source: PubMed Central journal article supplement (PMC6035259; doi:10.1038/s41416-018-0141-7), 2018-06-19
Supplement: 41416_2018_141_MOESM7_ESM.pdf [file 41416_2018_141_MOESM7_ESM.pdf]

| <b>DNA Repair Pathway</b>         | <b>Tier 1 BF</b>     | <b>Tier 1&amp;2 BF</b> | <b>Genes BF &gt;100 in either analysis</b> |
|-----------------------------------|----------------------|------------------------|--------------------------------------------|
| Base Excision Repair (BER)        | 2.4                  | 7.6                    |                                            |
| DNA damage disease linked         | 1.7                  | 7.4                    |                                            |
| DNA damage response               | 3.8                  | 7.8                    |                                            |
| DNA polymerases                   | 0 <sup>§</sup>       | 8.3                    |                                            |
| Fanconi Anemia (FA)               | 6.2                  | 19.5                   |                                            |
| Homologous Recombination (HR)     | 7.3                  | 558                    | <i>NBN</i> (BF = 655.55)                   |
| Mismatch Repair (MMR)             | 0 <sup>§</sup>       | 18                     |                                            |
| Nucleotide Excision Repair (NER)  | 8.6                  | 10.9                   |                                            |
| Non-Homologous End Joining (NHEJ) | 0 <sup>§</sup>       | 1.5                    |                                            |
| Poly ADP-Ribose Polymerase (PARP) | n/a <sup>&amp;</sup> | 3.7                    |                                            |

<sup>§</sup> All models in the model space enumerated due to low numbers of Tier 1 variants in the pathway

<sup>&</sup> No Tier 1 variants were present in any genes within this pathway

**Supplementary Table 3 – Results of Bayesian Risk Index analysis of Individual DNA Repair Pathways.** The global Bayes Factor (BF) for each gene set are listed for Tier 1 only or Tier 1 & 2 variants combined, alongside individual genes with BF ≥100 in either variant set analysis.
