# Supplementary material for: Rare germline variants in DNA repair genes and the angiogenesis pathway predispose prostate cancer patients to develop metastatic disease
Source: PubMed Central journal article supplement (PMC6035259; doi:10.1038/s41416-018-0141-7), 2018-06-19
Supplement: 41416_2018_141_MOESM8_ESM.pdf [file 41416_2018_141_MOESM8_ESM.pdf]

| Hallmark Gene Set                 | Global BF | Genes with Gene Level BF ≥100                                                    |
|-----------------------------------|-----------|----------------------------------------------------------------------------------|
| IL6_JAK_STAT3_SIGNALING           | 159.3     | <i>ACVRL1</i> (BF = 5266.6)                                                      |
| ANGIOGENESIS                      | 84.5      | <i>LUM</i> (BF = 590.3)                                                          |
| INTERFERON_ALPHA_RESPONSE         | 16.0      |                                                                                  |
| TGF_BETA_SIGNALING                | 14.3      |                                                                                  |
| KRAS_SIGNALING_DN                 | 13.0      | <i>CHRNA1</i> (BF = 1846.1); <i>PARK2</i> (BF = 853.3); <i>RYR1</i> (BF = 362.6) |
| PANCREAS_BETA_CELLS               | 8.6       |                                                                                  |
| NOTCH_SIGNALING                   | 8.5       |                                                                                  |
| REACTIVE_OXIGEN_SPECIES_PATHWAY   | 6.8       |                                                                                  |
| CHOLESTEROL_HOMEOSTASIS           | 6.1       |                                                                                  |
| ESTROGEN_RESPONSE_LATE            | 5.7       | <i>WISP2</i> (BF = 1391.3); <i>DHRS2</i> (BF = 240.8)                            |
| WNT_BETA_CATENIN_SIGNALING        | 5.5       |                                                                                  |
| MYC_TARGETS_V2                    | 5.3       |                                                                                  |
| HEDGEHOG_SIGNALING                | 5.2       |                                                                                  |
| INFLAMMATORY_RESPONSE             | 4.9       | <i>AXL</i> (BF = 610.1)                                                          |
| SPERMATOGENESIS                   | 4.6       | <i>MTOR</i> (BF = 133.4)                                                         |
| APICAL_SURFACE                    | 4.4       |                                                                                  |
| PEROXISOME                        | 3.4       |                                                                                  |
| ANDROGEN_RESPONSE                 | 3.4       |                                                                                  |
| PI3K_AKT_MTOR_SIGNALING           | 3.2       |                                                                                  |
| APOPTOSIS                         | 3.0       | <i>LUM</i> (BF = 135.6)                                                          |
| UNFOLDED_PROTEIN_RESPONSE         | 2.9       |                                                                                  |
| PROTEIN_SECRETION                 | 2.5       |                                                                                  |
| COAGULATION                       | 2.1       |                                                                                  |
| DNA_REPAIR                        | 1.8       |                                                                                  |
| ALLOGRAFT_REJECTION               | 1.7       |                                                                                  |
| UV_RESPONSE_UP                    | 1.6       |                                                                                  |
| HYPOXIA                           | 1.5       | <i>WISP2</i> (BF = 655.3); <i>CP</i> (BF = 180.6)                                |
| OXIDATIVE_PHOSPHORYLATION         | 1.3       |                                                                                  |
| TNFA_SIGNALING_VIA_NFKB           | 1.3       |                                                                                  |
| MYC_TARGETS_V1                    | 1.2       |                                                                                  |
| BILE_ACID_METABOLISM              | 1.2       |                                                                                  |
| P53_PATHWAY                       | 1.1       |                                                                                  |
| MYOGENESIS                        | 0.9       | <i>CHRNA1</i> (BF = 201.2)                                                       |
| E2F_TARGETS                       | 0.7       |                                                                                  |
| INTERFERON_GAMMA_RESPONSE         | 0.7       |                                                                                  |
| FATTY_ACID_METABOLISM             | 0.7       |                                                                                  |
| MTORC1_SIGNALING                  | 0.7       |                                                                                  |
| COMPLEMENT                        | 0.6       |                                                                                  |
| UV_RESPONSE_DN                    | 0.5       |                                                                                  |
| IL2_STAT5_SIGNALING               | 0.3       |                                                                                  |
| KRAS_SIGNALING_UP                 | 0.3       |                                                                                  |
| G2M_CHECKPOINT                    | 0.3       |                                                                                  |
| HEME_METABOLISM                   | 0.3       |                                                                                  |
| ADIPOGENESIS                      | 0.2       |                                                                                  |
| GLYCOLYSIS                        | 0.1       |                                                                                  |
| ESTROGEN_RESPONSE_EARLY           | 0.1       |                                                                                  |
| XENOBIOTIC_METABOLISM             | 0.1       |                                                                                  |
| APICAL_JUNCTION                   | 0.0       |                                                                                  |
| MITOTIC_SPINDLE                   | 0.0       |                                                                                  |
| EPITHELIAL_MESENCHYMAL_TRANSITION | 0.0       |                                                                                  |

**Supplementary Table 4 – Results of Bayesian Risk Index analysis of Hallmark Gene Sets.** The global Bayes Factor (BF) for each gene set and individual genes with BF ≥100 in any analysis are listed.
