# Supplementary material for: Rare germline variants in DNA repair genes and the angiogenesis pathway predispose prostate cancer patients to develop metastatic disease
Source: PubMed Central journal article supplement (PMC6035259; doi:10.1038/s41416-018-0141-7), 2018-06-19
Supplement: 41416_2018_141_MOESM9_ESM.pdf [file 41416_2018_141_MOESM9_ESM.pdf]

| Gene          | Tier 1 & 2 |                 | Tier 1 only |                |
|---------------|------------|-----------------|-------------|----------------|
|               | Aggressive | Non- aggressive | Aggressive  | Non-aggressive |
| <i>ACVRL1</i> | 0          | 3               | 0           | 0              |
| <i>AXL</i>    | 10         | 1               | 0           | 0              |
| <i>CHRNA3</i> | 3          | 6               | 1           | 0              |
| <i>CP</i>     | 0          | 5               | 0           | 0              |
| <i>DHRS2</i>  | 3          | 12              | 0           | 0              |
| <i>LUM</i>    | 5          | 0               | 0           | 0              |
| <i>MTOR</i>   | 1          | 8               | 0           | 0              |
| <i>PARK2</i>  | 0          | 6               | 0           | 0              |
| <i>RYR1</i>   | 10         | 14              | 3           | 3              |
| <i>WISP2</i>  | 0          | 1               | 0           | 0              |

**Supplementary Table 5 – Burden of mutations between metastatic and non-aggressive cohorts for genes with BF  $\geq 100$  in the Bayesian Risk Index analysis of Hallmark Gene Sets.** Counts of Tier 1 variants, or Tier 1 and 2 variants combined, stratified by aggressiveness status. The majority of rare disruptive variants within the genes identified through this analysis were non-protein truncating, and were enriched in the non-aggressive cohort, implying a protective effect against the likelihood of developing metastatic PrCa.
