# Supplementary material for: Rare germline variants in DNA repair genes and the angiogenesis pathway predispose prostate cancer patients to develop metastatic disease
Source: PubMed Central journal article supplement (PMC6035259; doi:10.1038/s41416-018-0141-7), 2018-06-19
Supplement: 41416_2018_141_MOESM10_ESM.pdf [file 41416_2018_141_MOESM10_ESM.pdf]

**HALLMARK\_IL6\_JAK\_STAT3\_SIGNALING**

| Gene             | Mutation Count |            | Odds Ratio |
|------------------|----------------|------------|------------|
|                  | Non-aggressive | Aggressive |            |
| <i>ACVRL1</i>    | 3              | 0          | 0.14       |
| <i>CD36</i>      | 5              | 1          | 0.20       |
| <i>CRLF2</i>     | 2              | 0          | 0.20       |
| <i>CXCL10</i>    | 2              | 0          | 0.20       |
| <i>IL12RB1</i>   | 2              | 0          | 0.20       |
| <i>A2M</i>       | 4              | 1          | 0.25       |
| <i>PIK3R5</i>    | 4              | 1          | 0.25       |
| <i>IL4R</i>      | 3              | 1          | 0.33       |
| <i>CXCL9</i>     | 1              | 0          | 0.34       |
| <i>DNTT</i>      | 1              | 0          | 0.34       |
| <i>FAS</i>       | 1              | 0          | 0.34       |
| <i>IFNAR1</i>    | 1              | 0          | 0.34       |
| <i>IRF9</i>      | 1              | 0          | 0.34       |
| <i>PDGFC</i>     | 1              | 0          | 0.34       |
| <i>HAX1</i>      | 1              | 2          | 2.04       |
| <i>HMOX1</i>     | 1              | 2          | 2.04       |
| <i>IFNGR2</i>    | 1              | 2          | 2.04       |
| <i>IL6ST</i>     | 1              | 2          | 2.04       |
| <i>CBL</i>       | 0              | 1          | 3.06       |
| <i>CCL7</i>      | 0              | 1          | 3.06       |
| <i>CD38</i>      | 0              | 1          | 3.06       |
| <i>CD44</i>      | 0              | 1          | 3.06       |
| <i>CSF1</i>      | 0              | 1          | 3.06       |
| <i>CSF2RB</i>    | 0              | 1          | 3.06       |
| <i>IFNGR1</i>    | 0              | 1          | 3.06       |
| <i>IL18R1</i>    | 0              | 1          | 3.06       |
| <i>STAM2</i>     | 0              | 1          | 3.06       |
| <i>TGFB1</i>     | 0              | 1          | 3.06       |
| <i>TNF</i>       | 0              | 1          | 3.06       |
| <i>TNFRSF12A</i> | 0              | 1          | 3.06       |
| <i>INHBE</i>     | 1              | 3          | 3.09       |
| <i>IL1R2</i>     | 0              | 2          | 5.15       |
| <i>IL9R</i>      | 0              | 2          | 5.15       |
| <i>MAP3K8</i>    | 0              | 2          | 5.15       |
| <i>TLR2</i>      | 0              | 2          | 5.15       |

**HALLMARK\_ANGIOGENESIS**

| Gene            | Mutation Count |            | Odds Ratio |
|-----------------|----------------|------------|------------|
|                 | Non-aggressive | Aggressive |            |
| <i>JAG1</i>     | 3              | 0          | 0.14       |
| <i>CCND2</i>    | 2              | 0          | 0.20       |
| <i>COL3A1</i>   | 4              | 1          | 0.25       |
| <i>PTK2</i>     | 1              | 0          | 0.34       |
| <i>APOH</i>     | 2              | 1          | 0.50       |
| <i>THBD</i>     | 2              | 1          | 0.50       |
| <i>CXCL6</i>    | 1              | 2          | 2.04       |
| <i>JAG2</i>     | 1              | 2          | 2.04       |
| <i>SERPINA5</i> | 1              | 2          | 2.04       |
| <i>LPL</i>      | 0              | 1          | 3.06       |
| <i>LRPAP1</i>   | 0              | 1          | 3.06       |
| <i>NRP1</i>     | 0              | 1          | 3.06       |
| <i>PDGFA</i>    | 0              | 2          | 5.15       |
| <i>VTN</i>      | 0              | 2          | 5.15       |
| <i>VCAN</i>     | 1              | 6          | 6.32       |
| <i>ITGAV</i>    | 0              | 3          | 7.26       |
| <i>PRG2</i>     | 0              | 4          | 9.40       |
| <i>LUM</i>      | 0              | 5          | 11.57      |

**Supplementary Table 6 – Burden of predicted disruptive mutations in genes curated in the IL6/JAK/STAT signalling and angiogenesis Hallmark gene sets.** The number of rare (MAF  $\leq 1\%$ ) Tier 1 and 2 variants identified within non-aggressive and metastatic cases are listed for genes with odds ratio  $\geq 2$  or  $\leq 0.5$ . For genes with no mutations identified in one cohort, odds ratios were estimated through addition of 0.5 to the mutation count for both phenotype categories.
