# Supplementary material for: Rare germline variants in DNA repair genes and the angiogenesis pathway predispose prostate cancer patients to develop metastatic disease
Source: PubMed Central journal article supplement (PMC6035259; doi:10.1038/s41416-018-0141-7), 2018-06-19
Supplement: 41416_2018_141_MOESM11_ESM.pdf [file 41416_2018_141_MOESM11_ESM.pdf]

| <b>Gene</b>    | <b>GO term annotations</b>                                                                                               | <b>Function</b>                                                  |
|----------------|--------------------------------------------------------------------------------------------------------------------------|------------------------------------------------------------------|
| <i>ADAMTS3</i> | collagen fibril organization, vascular endothelial growth factor production                                              | A disintegrin and metalloproteinase with thrombospondin motifs 3 |
| <i>LTBP2</i>   | extracellular fibril organization                                                                                        | Latent-transforming growth factor beta-binding protein 2         |
| <i>MFAP5</i>   | extracellular matrix organization, extracellular fibril organization                                                     | Microfibrillar-associated protein 5                              |
| <i>COL5A1</i>  | blood vessel development, cell adhesion, cell migration, extracellular matrix organization, collagen fibril organization | Collagen alpha-1(V) chain                                        |
| <i>CD36</i>    | positive regulation of cell-matrix adhesion                                                                              | Platelet glycoprotein 4                                          |
| <i>RIPK3</i>   | amyloid fibril formation, necroptotic process                                                                            | Receptor-interacting serine/threonine-protein kinase 3           |
| <i>COL3A1</i>  | cell-matrix adhesion, extracellular matrix organization, collagen fibril organization                                    | Collagen alpha-1(III) chain                                      |
| <i>GSN</i>     | actin filament polymerization, regulation of wound healing, spreading of epidermal cells                                 | Gelsolin                                                         |

**Supplementary Table 7 – Description of genes annotated with GO term “fibril organization”.**
